# Supplementary material for: Novel Composite Electrode of the Reduced Graphene Oxide Nanosheets with Gold Nanoparticles Modified by Glucose Oxidase for Electrochemical Reactions
Source: Preprints.org preprint supplement (doi:10.20944/preprints201909.0093.v1), 2019-09-09
Supplement: Supplementary file 1 [file supplementary]

Supporting information

**Novel Composite Electrode of the Reduced Graphene Oxide Nanosheets with Gold Nanoparticles Modified by Glucose Oxidase for Electrochemical Reactions**

*Li Dong<sup>a, b</sup>, Wenjuan Yu<sup>a, c</sup>, Minmin Liu<sup>a</sup>, Yang Liu<sup>a</sup>, Qinsi Shao<sup>a</sup>, Aijun Li<sup>a</sup>, Wei Yan<sup>a, 1</sup>,*

*Jiujun Zhang<sup>a, \*</sup>*

<sup>a</sup> Institute for Sustainable Energy/College of Sciences, Shanghai University,

Shanghai, 200444, P.R. China

<sup>b</sup> Zhaoqing Battery Technology Co. Ltd, Guangdong, 518052, P.R. China

<sup>c</sup> Shipbuilding Technology Research Institute, Shanghai, 200032, P.R. China

Corresponding Authors. *Fax:* +86 21 6613138

*E-mail addresses:* yveayan@shu.edu.cn, jiujun.zhang@i.shu.edu.cn

---

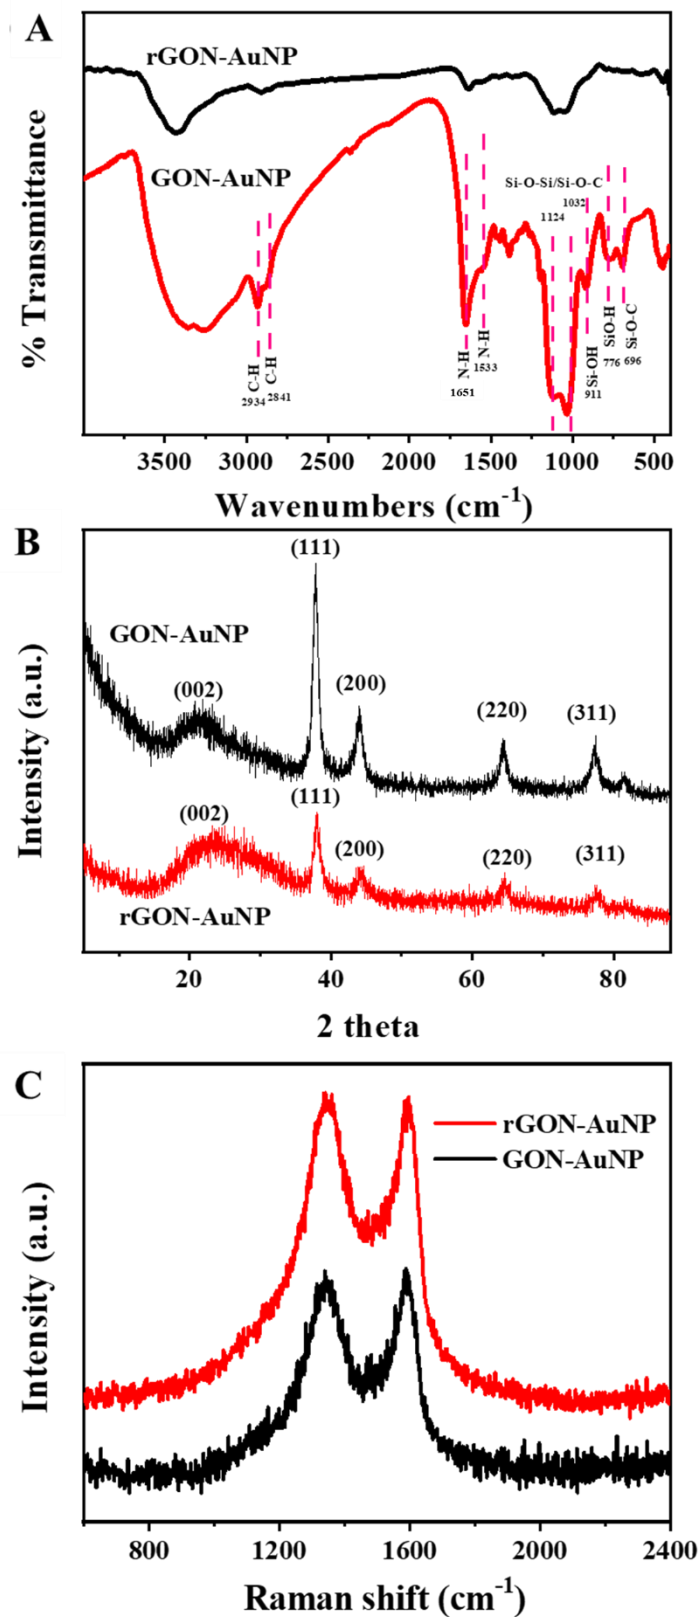

Figure S1. (A) FTIR spectra, (B) XRD patterns and (C) Raman spectra of GON-AuNP and rGON-AuNP.

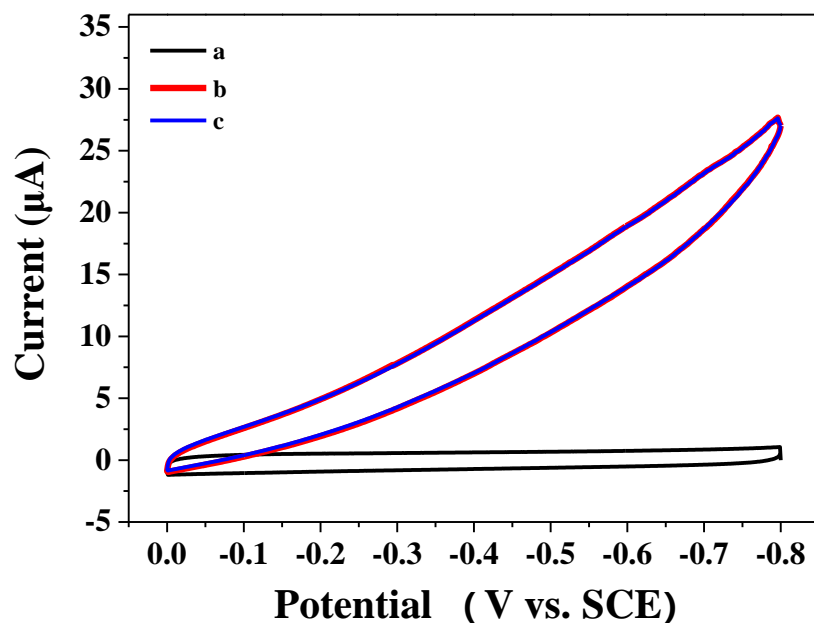

Figure S2. Cyclic voltammograms of rGON-AuNP/GC electrode in nitrogen-purged PBS (curve a), air-saturated PBS (curve b) and air-saturated PBS containing 5mM glucose.

The reduction peak current rGON-AuNP/GC electrode greatly increases in air-saturated PBS (curve b) due to the electrochemical reduction of oxygen. As there is no GOD adsorbed on rGON-AuNP/GC electrode, oxygen in solution cannot be consumed through glucose oxidation. Therefore, curve b shows almost no variation when 5mM glucose is added (curve c).

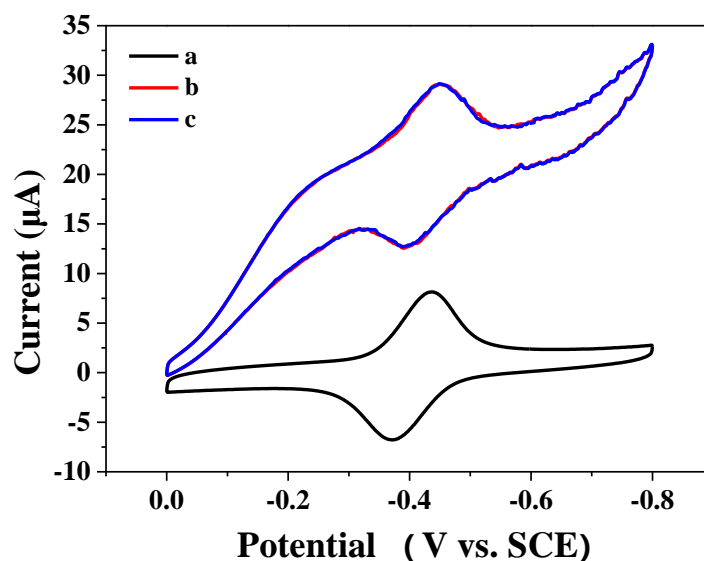

Figure S3. Cyclic voltammograms of FAD/rGON-AuNP/GC electrode in nitrogen-purged PBS (curve a), air-saturated PBS (curve b) and air-saturated PBS containing 5mM glucose.

A pair of redox peaks, assigned to the free FDA adsorbed on the electrode, is observed on curve a (curve a). The reduction peak current of FAD/rGON-AuNP/GC electrode greatly increases in air-saturated PBS (curve b) because the electrochemical reduction of oxygen on rGON-AuNPs/GC electrode. As free FAD cannot catalyze glucose oxidation, oxygen in solution will not be consumed through glucose oxidation. The CV of GOD/rGON-AuNP/GC electrode in air-saturated PBS almost has no variation when 5mM glucose is added (curve c).
